# Supplementary material
Source: MDPI journal article supplement (https://www.mdpi.com/2073-4352/13/5/832)
Supplement: s1 [file s1]

Supporting information

# Ultrafast Mechanism of Material Removal in the Femtosecond Laser Ablation of WS<sub>2</sub> and Its Diode Rectification Characteristics

Kai Wang <sup>1,†</sup>, Zhicheng Chen <sup>1,†</sup>, Xu Wu <sup>1</sup>, Changji Pan <sup>1,‡</sup>, Feifei Wang <sup>1,§</sup>, Jiaxing Wang <sup>1</sup>, Ke Zhang <sup>1</sup>, Yang Yang <sup>2</sup> and Jingya Sun <sup>1,3,\*</sup>

<sup>1</sup> Laser Micro/Nano Fabrication Laboratory, School of Mechanical Engineering, Beijing Institute of Technology, Beijing 100081, China

<sup>2</sup> Beijing National Laboratory for Condensed Matter Physics, Institute of Physics, Chinese Academy of Sciences, Beijing 100190, China

<sup>3</sup> Yangtze Delta Region Academy of Beijing Institute of Technology, Jiaxing 314019, China

\* Correspondence: sjy@bit.edu.cn

† These authors contributed equally to this work.

‡ Present Address: Faculty of Physics, University of Duisburg-Essen, Lotharstrasse 1, 47057 Duisburg, Germany.

§ Present Address: Lab. of Precision Measurement and Intelligent Sensing Technology, College of Control Science and Engineering, China University of Petroleum, Qingdao 266580, China.

Two laser beams were obtained using a beam splitter, and one of the beams was incident on the sample surface at an angle of  $45^\circ$  to excite the material. The other beam had its first frequency doubled to 400 nm using a beta barium borate (BBO) crystal, and it was then perpendicularly focused on the pumped region to probe the state of the sample after irradiation. To achieve the time-resolved signal, the delay line was used to control the temporal interval between the pump and probe beam.

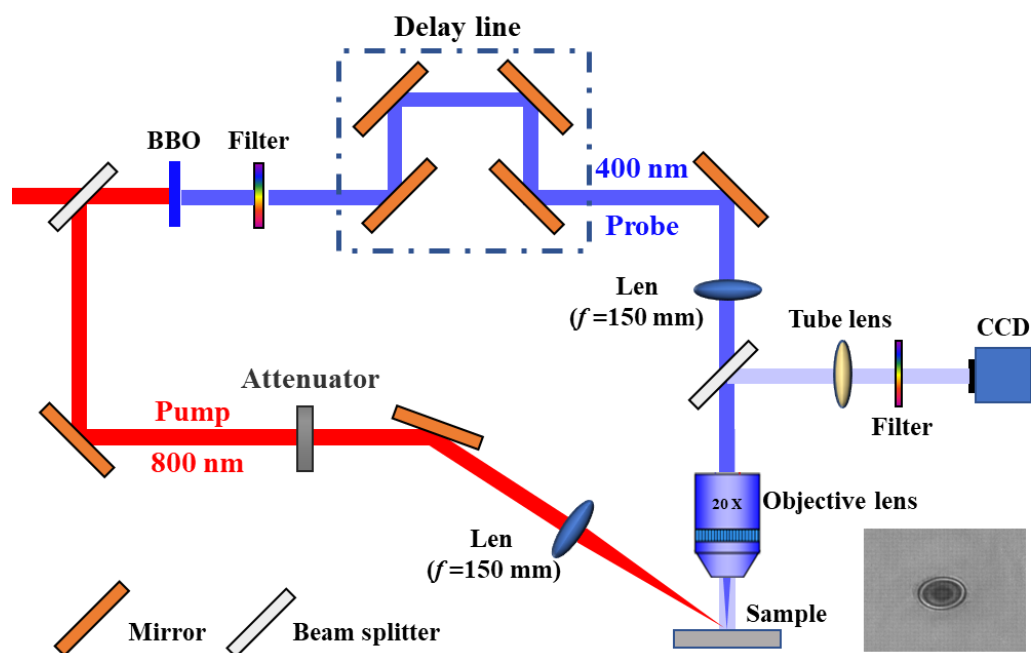

Figure S1. Schematic diagram of pump-probe system.

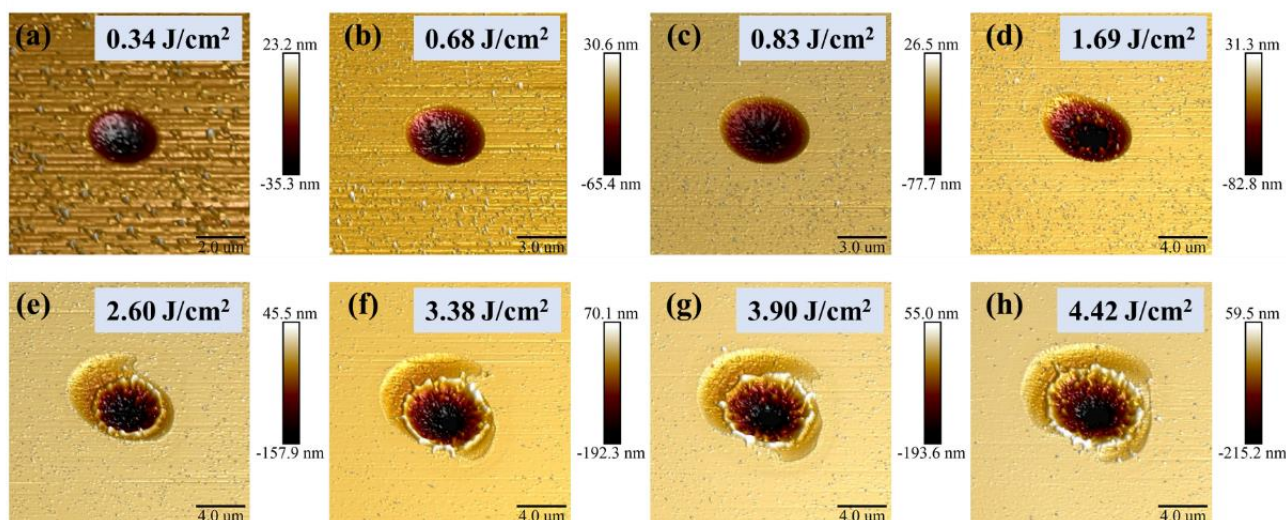

Figure S2. AFM micrographs of the craters ablated with different fluence.
