# Supplementary material
Source: MDPI journal article supplement (https://www.mdpi.com/2073-4352/13/5/832)
Supplement: s1 [file s1]

Archive with 1 entries (1 files):
- crystals-2400749-supplementary.pdf
